# Supplementary material
Source: PubMed Central journal article supplement (PMC5747312)
Supplement: NIHMS927573-supplement-Supplemental.pdf [file NIHMS927573-supplement-Supplemental.pdf]

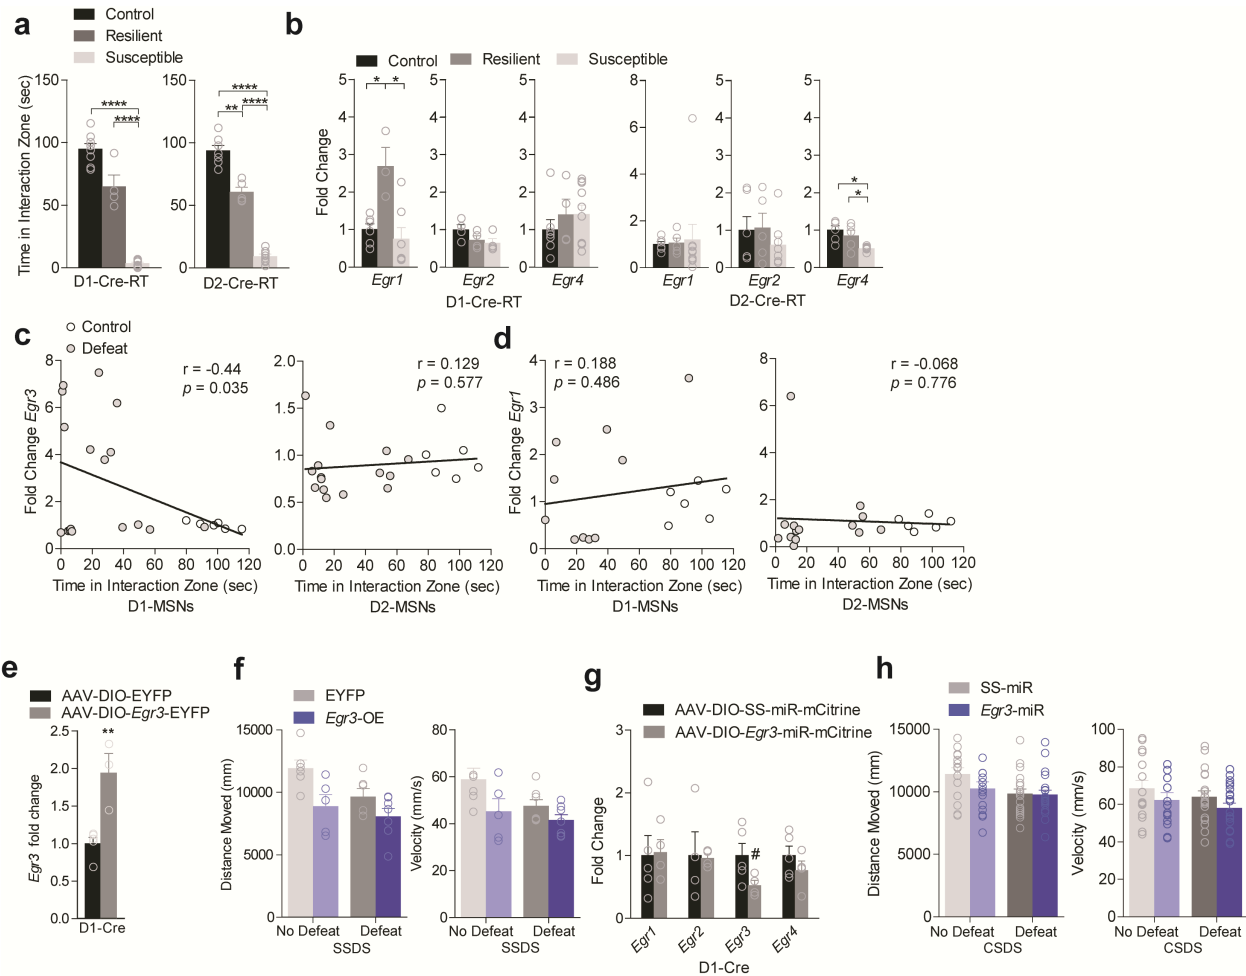

**Supplementary Figure 1. D1-Cre-RiboTag (RT) and D2-Cre-RT behavior, *Egr* expression, and locomotor measures.** (a) Defeat significantly reduced time in the interaction zone in both RT animal lines (D1-Cre-RT,  $F_{2,19}=134.4$ ,  $p<0.0001$ ,  $n=4-8$  pooled mice per group; D2-Cre-RT,  $F_{2,19}=187.5$ ,  $p<0.0001$ ,  $n=4-8$  pooled mice per group). (b) *Egr* expression in MSN subtypes. D1-Cre-RT: *Egr1* is up-regulated in resilient mice ( $F_{2,16}=8.61$ ,  $p<0.01$ ), while no change is observed in *Egr2* ( $F_{2,11}=2.35$ ,  $p>0.05$ ) or *Egr4* ( $F_{2,20}=0.66$ ,  $p>0.05$ ;  $n=4-10$  samples per group for each gene analyzed). D2-Cre-RT: *Egr4* is downregulated in susceptible mice ( $F_{2,19}=9.68$ ,  $p<0.01$ ) with no change in *Egr1* ( $F_{2,20}=0.50$ ,  $p>0.05$ ) or *Egr2* ( $F_{2,18}=0.68$ ,  $p>0.05$ ). (c) A significant negative correlation between *Egr3* expression and time in the interaction zone was observed in D1-MSNs only. (d) No correlation was observed between *Egr1* expression and time in the interaction zone in both subtypes. (e) *Egr3*-OE significantly enhanced *Egr3* expression in the NAc of D1-Cre mice ( $t_6=4.27$ ,  $p<0.01$ ). (f) No difference was observed in distance moved ( $F_{1,20}=1.03$ ,  $p>0.05$ ,  $n=5-7$  mice per group) or velocity ( $F_{1,20}=0.97$ ,  $p>0.05$ ,  $n=5-7$  mice per group) following D1-MSN *Egr3*-OE in defeated and non-defeated conditions. (g) *Egr3*-miR reduced *Egr3* expression in the NAc of D1-Cre mice ( $t_7=2.06$ ,  $p=0.0783$ ), but not other *Egr* genes. (h) No difference was observed in distance moved ( $F_{1,26}=0.06$ ,  $p>0.05$ ,  $n=6-9$  mice per group) or velocity ( $F_{1,26}=0.09$ ,  $p>0.05$ ,  $n=6-9$  mice per group) following D1-MSN *Egr3*-miR expression in defeated and non-defeated conditions.

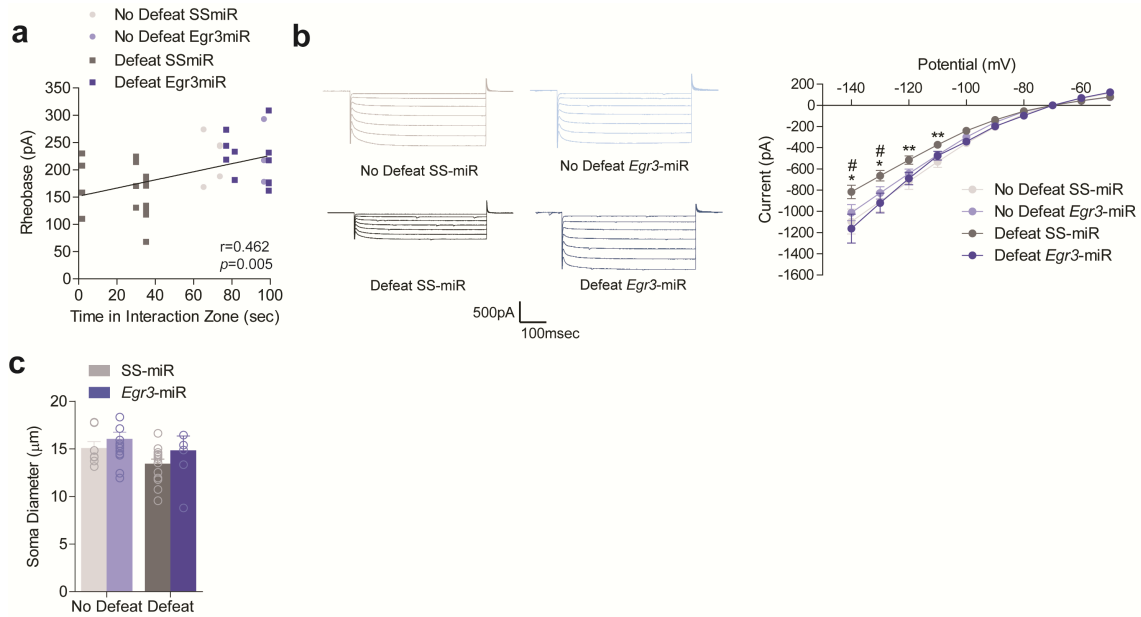

**Supplementary Figure 2. Rectification in NAc D1-MSNs is attenuated in defeat mice.** (a) A significant positive correlation was observed between rheobase and time in the interaction zone. (b) Defeated mice injected with SS-miR displayed reduced rectification as demonstrated by smaller current plateaus produced by negative voltage deflections ( $F_{21,245}=2.17$ ,  $p<0.01$ ,  $N(n)=3-4(7-14)$ ). Capacitive transients are removed for clarity. No defeat SS-miR vs. defeat SS-miR; \* $p<0.05$ , \*\* $p<0.01$ ; # $p<0.05$  defeat SS-miR vs. defeat *Egr3*-miR. (c) Soma diameter remained unaltered across groups ( $F_{1,38}=0.06$ ,  $p>0.05$ ; 6-15 cells per group).

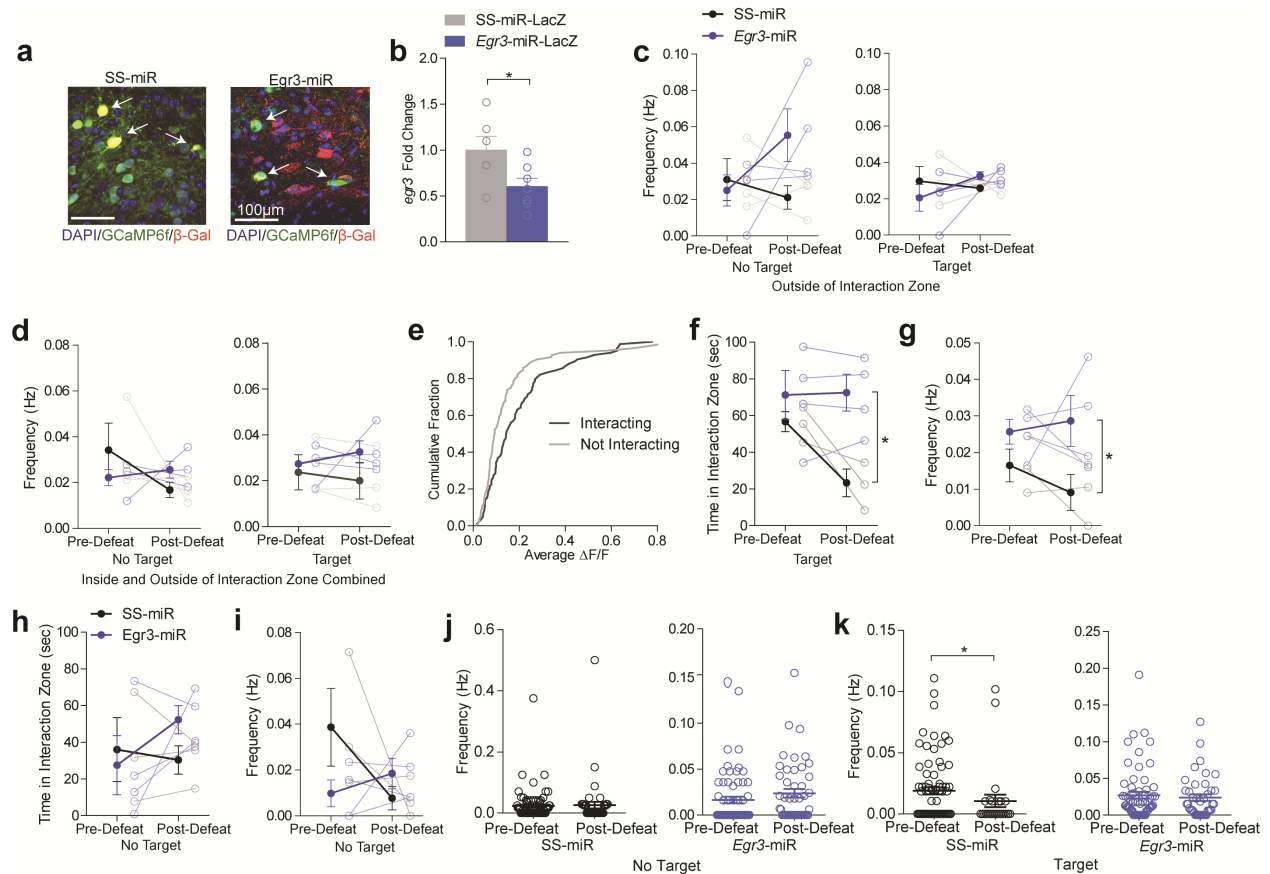

**Supplementary Figure 3. GCaMP6f expression and behavior dependent frequency alterations.** (a) Expression of LacZ reporter with AAV2.2-DIO-Egr3miR-LacZ is colocalized with GCaMP6f D1-MSN expressing cells. Arrows indicate examples of colocalization of LacZ and GCaMP6. Arrows indicate overlap. (b) Egr3 is significantly knocked down in the NAc of D1-Cre mice injected with AAV2.2-DIO-Egr3-miR-LacZ in comparison to AAV2.2-DIO-SS-miR-LacZ controls ( $t_{11}=2.36$ ,  $p<0.05$ ,  $n=4-9$  samples per group). (c) No difference was observed in social interaction in the no target condition ( $F_{1,5}=1.84$   $p>0.05$ ). (d) No differences were observed in frequency when mice were outside of the interaction zone in the no target ( $F_{1,5}=2.97$ ,  $p>0.05$ ) and target ( $F_{1,5}=1.41$ ,  $p>0.05$ ) conditions. (e) A rightward shift in the distribution of  $\Delta F/F$  events is observed when animals are within the interaction zone (IZ) versus outside of the interaction zone (IZ) (Kolmogorov-Smirnov test  $D=0.23$ ,  $p<0.01$ ). (f-g) Means represented with individual animals for time in the interaction zone and frequency measures, respectively. (h) No difference was found in frequency of calcium transients when times were averaged across the entire social interaction session in the no target and target condition (no target  $F_{1,5}=1.94$ ,  $p>0.05$ ; target  $F_{1,5}=0.77$ ,  $p>0.05$ ). (i) Frequency of calcium events is unchanged following defeat in the no target condition ( $F_{1,5}=4.74$ ,  $p>0.05$ ,  $n=3-4$  cells per group). (j) No differences were observed in individual cell firing frequency in the no target condition (SS-miR Mann-Whitney  $U(4943, 2932)$   $p>0.05$ ; Egr3-miR Mann-Whitney  $U(3508, 3047)$   $p>0.05$ ). (k) Individual cell firing frequency was significantly reduced in SS-miR mice after defeat (Mann-Whitney  $U(6590, 2863)$   $p<0.001$ ), but not in Egr3-miR mice (Mann-Whitney  $U(3353, 2107)$   $p>0.05$ ).

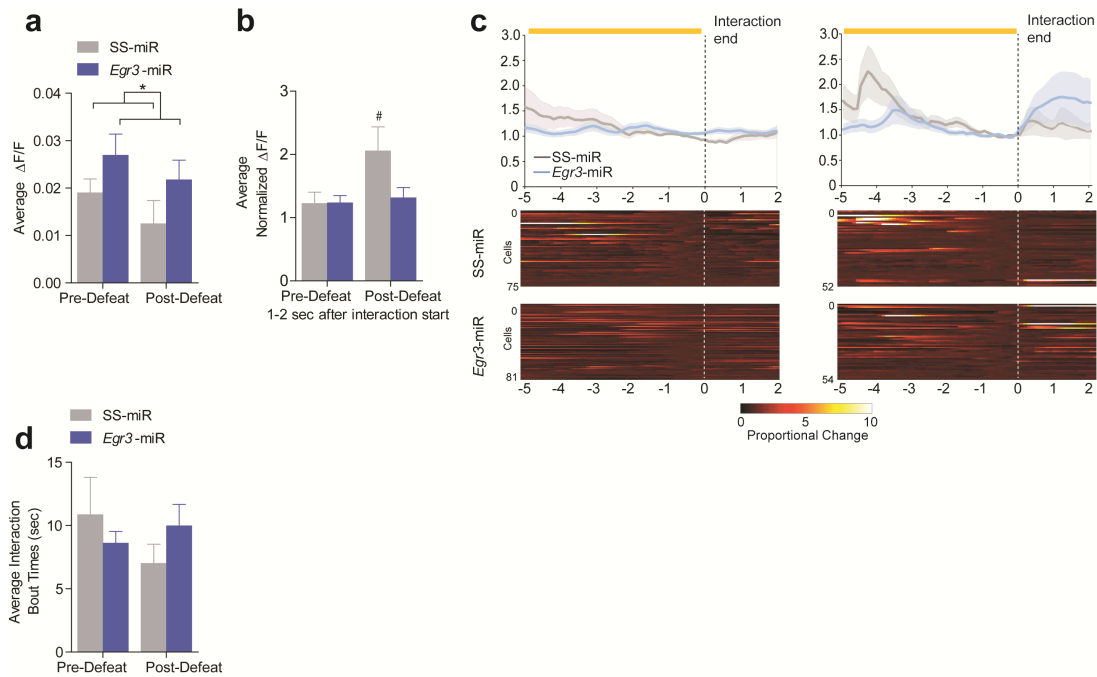

**Supplementary Figure 4. Magnitude of calcium transients differs among SS-miR and *Egr3*-miR mice.** (a) The average  $\Delta F/F$  amplitude was significantly enhanced by *Egr3* knockdown (Main effect of virus  $F_{1,208}$ ,  $p < 0.05$ ). (b) The magnitude of normalized  $\Delta F/F$  amplitude is increased in SS-miR mice by defeat (Interaction  $F_{1,19301} = 4.57$ ,  $p < 0.0001$ ; Main effect of knockdown  $F_{1,19301} = 6.02$ ,  $p < 0.05$ ). (c) Average normalized  $\Delta F/F$  traces showing calcium activity 5sec prior to and 2sec following the termination of a social interaction bout. Calcium transient magnitude is increased above baseline before the end of social interaction after defeat in SS-miR mice (See **Supplementary Table 3**). (d) Average individual bout times of SS-miR mice compared to *Egr3*-miR mice.

**Supplemental Movie 1.** Processed calcium signal and behavior of a SS-miR mouse following defeat. *Left* Example of a registered and background subtracted video used for analysis. *Right* SS-miR mouse in the social interaction test following defeat.

**Supplemental Movie 2.** Processed calcium signal and behavior of an Egr3-miR mouse following defeat. *Left* Example of a registered and background subtracted video used for analysis. *Right* Egr3-miR mouse in the social interaction test following defeat.

**Supplementary Table 1. Primer list for qPCR and ChIP**

|                | Gene           | Direction              | Sequence                |
|----------------|----------------|------------------------|-------------------------|
| qPCR           | <i>Gapdh</i>   | forward                | AGGTCGGTGTGAACGGATTTG   |
|                |                | reverse                | TGTAGACCATGTAGTTGAGGTCA |
|                | <i>Egr1</i>    | forward                | CTCCCTTCAGCGCTAGACC     |
|                |                | reverse                | ATGCTGTACAAAGATGCAGGG   |
|                | <i>Egr2</i>    | forward                | GAAGGAACGGAAGAGCAGTG    |
|                |                | reverse                | AGCCAGAGCTTCATCTCACG    |
|                | <i>Egr3</i>    | forward                | ACTCGGTAGCCCATTACAATC   |
|                |                | reverse                | TGGCTGGAAAGAGCTCGAAT    |
| ChIP           | <i>Egr4</i>    | forward                | ACCCACAGAACAGGCACTTC    |
|                |                | reverse                | ACTTCCCCAGCTTGTCTCTG    |
|                | <i>RhoA</i>    | forward                | CAGGGCGTGGATGCGT        |
|                |                | reverse                | GACGTGCGCGGCCCCGAG      |
|                | <i>RhoB</i>    | forward                | GCGCATCCAAGCCTATGAC     |
|                |                | reverse                | CAGCCATTCTGGGATCCGTA    |
|                | <i>RhoC</i>    | forward                | TCCCCAAAGCTTCCTCAACC    |
|                |                | reverse                | GCATGGAGTCTTACAAGGATG   |
|                | <i>Cdc42</i>   | forward                | CGCCAGGAGTTACTTTTCG     |
|                |                | reverse                | TGAAGGTGAAGGTGGGAAGG    |
|                | <i>Kalrn</i>   | forward                | TGGTTGAGCATCTGGCTTCT    |
|                |                | reverse                | GGAGAAGGCCACGGTTAAAA    |
|                | <i>Rhobtb2</i> | forward                | CCAGGAGTCTGGGTCTCCA     |
|                |                | reverse                | GTGAGATGTCTGGGGTCACT    |
|                | <i>Shank2</i>  | forward                | GGGAGAGACACAGAGCTGG     |
|                |                | reverse                | GGAATGTAGTGTGCAGCAGG    |
|                | <i>Actn1</i>   | forward                | GAGCACAGTGCCATTTGGT     |
|                |                | reverse                | TGTGCATATAGGTGGACTGGG   |
|                | <i>Arc</i>     | forward                | TTCTCTGCTTGTTCCTCC      |
|                |                | reverse                | TGAGAGGAATGTCTTTCTGGG   |
| <i>Mmp25</i>   | forward        | TTTCGGTCTCCCGTTGCT     |                         |
|                | reverse        | CTGTGTGATCCCAGTTGCG    |                         |
| <i>Rap1a</i>   | forward        | TAAATAGATTCCGGACACAGCG |                         |
|                | reverse        | AGAGGAGGGAGGAGGAGGA    |                         |
| <i>GSK3a</i>   | forward        | CTTCTACCCCTCAGCTCTC    |                         |
|                | reverse        | AAGGAGAAGTGGGAACCTCC   |                         |
| <i>CREB</i>    | forward        | CCGG GAAGTAGCCGAAGG    |                         |
|                | reverse        | GCCACTCACGAAACAGC      |                         |
| <i>CamKIIa</i> | forward        | CGTCCCCACAGCATCTTCT    |                         |
|                | reverse        | CCTTGCTCCTTGTCCCC      |                         |

**Supplementary Table 2. Table of Statistics**

| Figure | Panel         | Test                    | Panel                               | Test Statistic                                     | Exact P-value |
|--------|---------------|-------------------------|-------------------------------------|----------------------------------------------------|---------------|
| 1      | b             | One-way ANOVA           | D1-MSN                              | $F_{2,22}=4.98$                                    | 0.0176        |
|        |               | One-way ANOVA           | D2-MSN                              | $F_{2,20}=0.51$                                    | 0.6088        |
|        | d             | Two-way ANOVA           | No Target                           | interaction: $F_{1,30}=2.79$                       | 0.1053        |
|        |               | Two-way ANOVA           | Target                              | interaction: $F_{1,30}=7.01$                       | 0.0128        |
|        |               |                         |                                     | main effect virus: $F_{1,30}=10.41$                | 0.0030        |
|        |               |                         |                                     | main effect defeat: $F_{1,30}=39.11$               | <0.0001       |
|        | e             | Two-way ANOVA           | No Target                           | interaction: $F_{1,71}=3.13$                       | 0.0811        |
|        |               | Two-way ANOVA           | Target                              | interaction: $F_{1,71}=11.88$                      | 0.0010        |
|        |               |                         |                                     | main effect virus: $F_{1,71}=6.22$                 | 0.0150        |
|        |               |                         |                                     | main effect defeat: $F_{1,71}=37.34$               | <0.0001       |
| f      | Two-way ANOVA | Sucrose Pref            | interaction: $F_{1,36}=4.26$        | 0.0462                                             |               |
| 2      | a             | Kolmogorov–Smirnov test | Cumulative Probability Plot         | No defeat SS-miR vs. Defeat SS-miR $D_{2973}=0.12$ | <0.0001       |
|        |               | Two-way ANOVA           | Frequency                           | interaction: $F_{1,55}=6.54$                       | 0.0340        |
|        |               |                         |                                     | main effect virus: $F_{1,55}=6.54$                 | 0.0134        |
|        |               |                         |                                     | main effect defeat: $F_{1,55}=4.19$                | 0.0456        |
|        |               | Two-way ANOVA           | Amplitude                           | interaction: $F_{1,55}=2.78$                       | 0.1010        |
|        | b             | Two-way ANOVA           |                                     | interaction: $F_{1,33}=22.46$                      | <0.0001       |
|        |               |                         |                                     | main effect virus: $F_{1,33}=18.57$                | 0.0001        |
|        | c             | Two-way ANOVA           | Thin                                | interaction: $F_{1,33}=8.71$                       | 0.0058        |
|        |               |                         |                                     | main effect virus: $F_{1,33}=7.53$                 | 0.0097        |
|        |               |                         |                                     | main effect defeat: $F_{1,33}=4.42$                | 0.0432        |
|        |               | Stubby                  | interaction: $F_{1,33}=12.43$       | 0.0013                                             |               |
|        |               |                         | main effect virus: $F_{1,33}=15.00$ | 0.0005                                             |               |
|        |               |                         | main effect defeat: $F_{1,33}=4.86$ | 0.0346                                             |               |
|        |               | Mushroom                | interaction: $F_{1,33}=3.44$        | 0.0724                                             |               |
| 3      | a             | Two-way RM ANOVA        | Rheobase                            | interaction: $F_{1,42}=7.25$                       | 0.0102        |
|        |               |                         | I vs. APs                           | interaction: $F_{15,240}=2.06$                     | 0.0127        |
|        |               |                         |                                     | main effect current: $F_{15,240}=174.3$            | <0.0001       |
|        | b             | Two-way ANOVA           |                                     | interaction: $F_{1,58}=10.46$                      | 0.0020        |

|   |   |                                    |                |                                               |             |
|---|---|------------------------------------|----------------|-----------------------------------------------|-------------|
|   | c | Two-way ANOVA                      |                | interaction: $F_{1,52}=4.37$                  | 0.0415      |
|   |   |                                    |                | main effect virus: $F_{1,52}=7.76$            | 0.0075      |
|   |   |                                    |                | main effect defeat: $F_{1,52}=4.55$           | 0.0377      |
|   | d | Two-way RM ANOVA                   | Sholl Analysis | interaction: $F_{33,308}=2.10$                | 0.0006<br>< |
|   |   |                                    |                | main effect distance: $F_{33,308}=122.4$      | 0.0001      |
|   | e | Two-way ANOVA                      |                | interaction: $F_{1,28}=9.31$                  | 0.0049      |
|   | f | Two-way ANOVA                      |                | interaction: $F_{1,28}=6.74$                  | 0.0148      |
|   |   |                                    |                | main effect of virus: $F_{1,28}=11.25$        | 0.0023      |
| 4 | a | t-test                             | no target      | $t_{13}=1.21$                                 | 0.2474      |
|   |   |                                    | target         | $t_{13}=5.24$                                 | 0.0002      |
|   | b | t-test                             | <i>RhoA</i>    | $t_{12}=2.35$                                 | 0.0364      |
|   |   |                                    | <i>RhoB</i>    | $t_{13}=2.15$                                 | 0.0506      |
|   |   |                                    | <i>RhoC</i>    | $t_{13}=0.55$                                 | 0.5951      |
|   |   |                                    | <i>Cdc42</i>   | $t_{13}=0.07$                                 | 0.9472      |
|   |   |                                    | <i>Kalrn</i>   | $t_{13}=0.09$                                 | 0.9333      |
|   |   |                                    | <i>Rhobtb2</i> | $t_{12}=0.01$                                 | 0.9923      |
|   |   |                                    | <i>Shank2</i>  | $t_{12}=2.79$                                 | 0.0164      |
|   |   |                                    | <i>Actn1</i>   | $t_{12}=2.49$                                 | 0.0286      |
|   |   |                                    | <i>Arc</i>     | $t_{13}=0.05$                                 | 0.9583      |
|   |   |                                    | <i>Mmp25</i>   | $t_{13}=0.52$                                 | 0.6126      |
|   |   |                                    | <i>Rap1a</i>   | $t_{13}=0.35$                                 | 0.7318      |
|   |   |                                    | <i>GSK3a</i>   | $t_{13}=0.12$                                 | 0.9058      |
|   |   |                                    | <i>CREB</i>    | $t_{13}=1.25$                                 | 0.2324      |
|   |   |                                    | <i>CamKIIa</i> | $t_{12}=2.29$                                 | 0.0507      |
| 5 | c | Two-way RM ANOVA                   |                | interaction: $F_{1,5}=10.82$                  | 0.0217      |
|   |   |                                    |                | main effect of defeat time:<br>$F_{1,5}=9.31$ | 0.0284      |
|   | d | Two-way RM ANOVA                   |                | interaction: $F_{1,5}=7.98$                   | 0.0085      |
|   |   |                                    |                | main effect virus: $F_{1,5}=6.33$             | 0.0167      |
|   |   |                                    |                | main effect defeat time: $F_{1,5}=8.76$       | 0.0143      |
|   | e | See <b>Supplementary Table 3-4</b> |                |                                               |             |
